# Supplementary material
Source: publisher figshare collection journal article supplement (https://acs.figshare.com/ndownloader/files/24321838)
Supplement: Supplementary file 1 [file 24321838]

Compound_ID	SMILES	IC50 CSF1R (nM)	Kd CSF1R (nM)	Kd FLT3 (nM)	Kd cKIT (nM)	Kd PDGFRa (nM)	Kd PDGFRb (nM)	Cell IC50 MNSF-60 (nM)	Cell pCSF1R IC50 THP-1 (nM)	Cell pPDGFRb HEK293 (nM)	hPPB (%)	rPPB (%)	mPPB (%)	hCL(Int) mic (mL/min/kg)	rCL(Int) mic (mL/min/kg)	mCL(Int) mic (mL/min/kg)	in vivo mCL (mL/min/kg)		F (%)
IACS-9439 (1)	O[C@H]1CCCC[C@@H]1NC(SC2=C3)=NC2=C(OC)C=C3OCC4=CC=NC(N)=N4>>	1.7	1	9500	17000	1900	450	7	17	3560	93.5	97.9	>99	14.9	38	59	14		100
2	C1(OCC2=CC=CN=C2)=CC=C(N=C(NC3CCCCC3)S4)C4=C1	781	ND	ND	ND	ND	ND	ND	ND	ND	ND	ND	ND	ND	ND	ND	ND	ND	ND
3	C1(OCC2=CC=NC=C2)=CC=C(N=C(NC3CCCCC3)S4)C4=C1	303	ND	ND	ND	ND	ND	ND	ND	ND	ND	ND	ND	ND	ND	ND	ND	ND	ND
4	C1(COC2=CC=CN=C2)=CC=C(N=C(NC3CCCCC3)S4)C4=C1	450	ND	ND	ND	ND	ND	ND	ND	ND	ND	ND	ND	ND	ND	ND	ND	ND	ND
5	C1(COC2=CC=NC=C2)=CC=C(N=C(NC3CCCCC3)S4)C4=C1	4413	ND	ND	ND	ND	ND	ND	ND	ND	ND	ND	ND	ND	ND	ND	ND	ND	ND
6	C1(CNC2=CC=CN=C2)=CC=C(N=C(NC3CCCCC3)S4)C4=C1	655	ND	ND	ND	ND	ND	ND	ND	ND	ND	ND	ND	ND	ND	ND	ND	ND	ND
7	C1(CNC2=CC=NC=C2)=CC=C(N=C(NC3CCCCC3)S4)C4=C1	27712	ND	ND	ND	ND	ND	ND	ND	ND	ND	ND	ND	ND	ND	ND	ND	ND	ND
8	NC1=CC(COC2=CC=C(N=C(NC3CCCCC3)S4)C4=C2)=CC=N1	52	ND	ND	ND	ND	ND	2269	ND	ND	ND	ND	ND	ND	ND	ND	ND	ND	ND
9	ClC1=CN=CC=C1COC2=CC=C(N=C(NC3CCCCC3)S4)C4=C2	30	1204	ND	ND	ND	ND	ND	ND	ND	ND	ND	ND	ND	ND	ND	ND	ND	ND
10	ClC1=C(N)N=CC=C1COC2=CC=C(N=C(NC3CCCCC3)S4)C4=C2	4	2.5	170	79	46	3.8	228	ND	ND	ND	ND	ND	ND	ND	ND	ND	ND	ND
11	ClC1=C(N)N=CC=C1COC2=CC=C(N=C(N[C@@H]3[C@@H](O)CCCC3)S4)C4=C2	2	1.1	65	44	1.3	0.84	50	ND	ND	ND	ND	ND	ND	ND	ND	ND	ND	ND
12	NC1=C(C(COC2=CC3=C(C=C2)N=C(S3)N[C@@H]4CCCC[C@H]4O)=CC=N1)Cl	1.4	0.6	74	180	12	19	163	160	429	>99	>99	>99	25	68	55	23	ND	>90
13	ClC1=C(N)N=CC=C1COC2=CC=C(N=C(N[C@@H]3[C@H](O)CCCC3)S4)C4=C2	1.1	1.2	400	170	28	1.2	98	ND	ND	ND	ND	ND	ND	ND	ND	ND	ND	ND
14	ClC1=C(N)N=CC=C1COC2=CC=C(N=C(N[C@H]3[C@@H](O)CCCC3)S4)C4=C2	2.4	1.9	320	1000	94	5.6	189	ND	ND	ND	ND	ND	ND	ND	ND	ND	ND	ND
15	NC1=C(C(COC2=CC(OC)=C3N=C(SC3=C2)N[C@@H]4CCCC[C@H]4O)=CC=N1)Cl	4	0.6	>30000	>30000	>30000	>30000	345	243	>50000	98.7	ND	>99	38	99	ND	ND	ND	ND
16	NC1=C(C(COC2=CC(OC(F)(F)F)=C3N=C(SC3=C2)N[C@@H]4CCCC[C@H]4O)=CC=N1)Cl	17	17	ND	ND	ND	ND	930	ND	ND	ND	ND	ND	ND	ND	ND	ND	ND	ND
17	NC1=C(C(COC2=CC(Cl)=C3N=C(SC3=C2)N[C@@H]4CCCC[C@H]4O)=CC=N1)Cl	1	8.1	590	>30000	>30000	>30000	288	191	4114	>99	>99	ND	32	78	ND	ND	ND	ND
18	NC1=C(C(COC2=CC(F)=C3N=C(SC3=C2)N[C@@H]4CCCC[C@H]4O)=CC=N1)Cl	1	2.5	1300	2100	370	230	125	127	1339	98.6	>99	ND	19	91	ND	ND	ND	ND
19	NC1=C(C(COC2=CC=C3N=C(SC3=C2Cl)N[C@@H]4CCCC[C@H]4O)=CC=N1)Cl	1.2	3.4	5.4	530	12	4.1	104	176	250	ND	ND	ND	ND	ND	ND	ND	ND	ND
20	NC1=C(C(COC2=CC=C3N=C(SC3=C2F)N[C@@H]4CCCC[C@H]4O)=CC=N1)Cl	1.1	1.3	23	790	32	6.7	194	ND	ND	ND	ND	ND	ND	ND	ND	ND	ND	ND
21	NC1=NC(COC2=CC(OC)=C3N=C(SC3=C2)N[C@@H]4CCCC[C@H]4O)=CC=N1	21	6.7	>30000	4800	4100	4900	504	486	41000	77.1	90.4	ND	10	24	ND	ND	ND	ND
22	NC1=NC(COC2=CC(OC)=C3N=C(SC3=C2)N[C@H]4CCCC[C@@H]4O)=CC=N1	7	4.1	>30000	>30000	>30000	>30000	178	215	>50000	77.6	92.2	ND	9.5	20	ND	12	ND	85
23	NC1=NC(COC2=CC(OC)=C3N=C(SC3=C2Cl)N[C@H]4CCCC[C@@H]4O)=CC=N1	2	2.6	>30000	>30000	>24000	27000	60	63	34254	97.2	98.3	ND	33	43	ND	14	ND	85
24	NC1=CC(COC2=CC(OC)=C3N=C(SC3=C2)N[C@@H]4CCCC[C@H]4O)=CC=N1	76	ND	ND	ND	ND	ND	1455	ND	ND	ND	ND	ND	ND	ND	ND	ND	ND	ND
25	O=C(C)NC1=CC(COC2=CC(OC)=C3N=C(SC3=C2)N[C@@H]4CCCC[C@H]4O)=CC=N1	4	ND	ND	ND	ND	ND	82	ND	ND	ND	ND	ND	20	ND	126	ND	ND	ND
26	O[C@H]1CCCC[C@@H]1NC(SC2=CC(OCC3=CC=NC(NC(NC)=O)=N3)=C4)=NC2=C4OC	11	ND	ND	ND	ND	ND	270	ND	ND	ND	ND	ND	23	19	ND	ND	ND	ND
27	O[C@H]1CCCC[C@@H]1NC(SC2=C3)=NC2=C(OC)C=C3OCC4=CC=NC(NC5=NN(C)C=C5)=N4	9	ND	ND	ND	ND	ND	105	ND	ND	ND	ND	ND	17	46	ND	ND	ND	ND
28	O[C@H]1CCCC[C@@H]1NC(SC2=C3)=NC2=C(OC)C=C3OCC4=CC=NC(NC5=CNN=C5)=N4	0.81	ND	ND	ND	ND	ND	7	ND	ND	ND	ND	ND	32	120	ND	ND	ND	ND
29	O[C@H]1CCCC[C@@H]1NC(SC2=C3)=NC2=C(OC)C=C3OCC4=CC=NC(NC5=NNC=C5)=N4	48	ND	ND	ND	ND	ND	1304	ND	ND	ND	ND	ND	ND	ND	ND	ND	ND	ND
30	O[C@H]1CCCC[C@@H]1NC(SC2=C3)=NC2=C(OC)C=C3OCC4=CC=NC(NC5=CON=C5)=N4	2.6	ND	ND	ND	ND	ND	26	ND	ND	ND	ND	ND	61	87	ND	ND	ND	ND
31	O[C@H]1CCCC[C@@H]1NC(SC2=C3)=NC2=C(OC)C=C3OCC4=CC=NC(NC5=CN(C)N=N5)=N4	5.7	ND	ND	ND	ND	ND	48	ND	ND	ND	ND	ND	43	25	ND	ND	ND	ND
32	O[C@H]1CCCC[C@@H]1NC(SC2=C3)=NC2=C(OC)C=C3OCC4=CC=NC(NC5=CN=CC=C5)=N4	626	ND	ND	ND	ND	ND	2511	ND	ND	ND	ND	ND	ND	ND	ND	ND	ND	ND
33	O[C@H]1CCCC[C@@H]1NC(SC2=C3Cl)=NC2=C(OC)C=C3OCC4=CC=NC(NC5=CN(C)N=C5)=N4	1.2	ND	ND	ND	ND	ND	14	ND	ND	ND	ND	ND	65	124	ND	ND	ND	ND
